# Supplementary material for: NiSe2/CeO2 catalysts from Ce-UiO-66 metal–organic skeletons and their electrocatalytic oxidation of methanol, urea and glycerol
Source: Royal Society of Chemistry journal article supplement (doi:10.1039/d3cp06273b), 2024-01-01
Supplement: d3cp06273b1.pdf [file d3cp06273b1.pdf]

# **NiSe<sub>2</sub>/CeO<sub>2</sub> catalysts from Ce-UiO-66 metal-organic skeleton and their electrocatalytic oxidation of methanol, urea and glycerol**

Jiaqi Huo, Ying Chang\*\*, Aiju Xu, Meilin Jia, Jingchun Jia\*,

*College of Chemistry and Environmental Science, Inner Mongolia Key Laboratory of Green  
Catalysis and Inner Mongolia Collaborative Innovation Center for Water Environment Safety,  
Inner Mongolia Normal University, Hohhot, 010022, China.*

\*Corresponding author. E-mail: [jjc1983@126.com](mailto:jjc1983@126.com), [changying@imu.edu.cn](mailto:changying@imu.edu.cn)

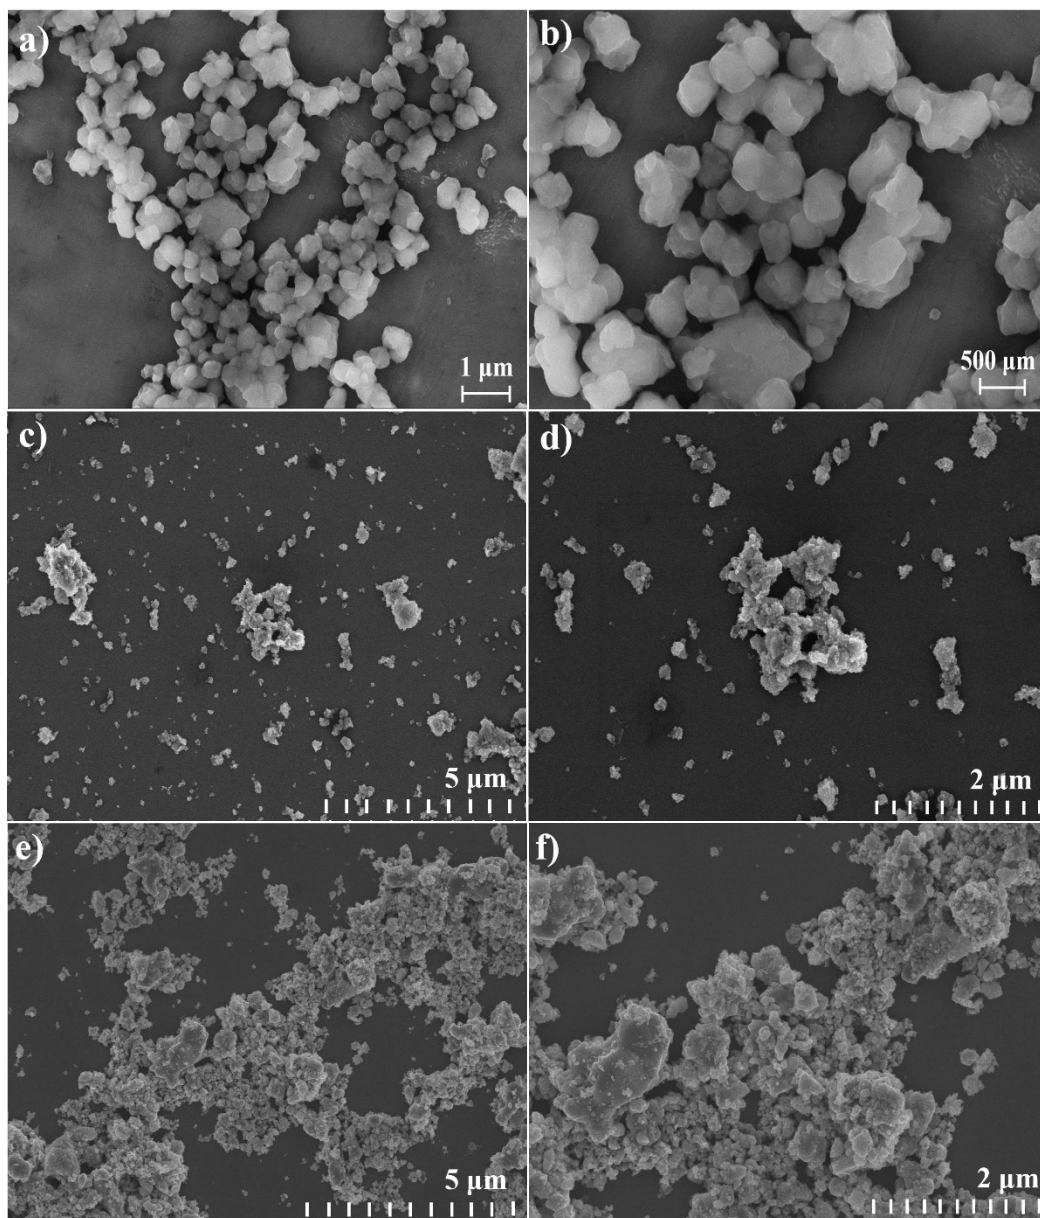

Fig S1. SEM images of the Ce-UiO-66 (a,b), Ni/CeO<sub>2</sub> (c,d), NiSe<sub>2</sub>/CeO<sub>2</sub>-450 °C (e,f) catalysts.

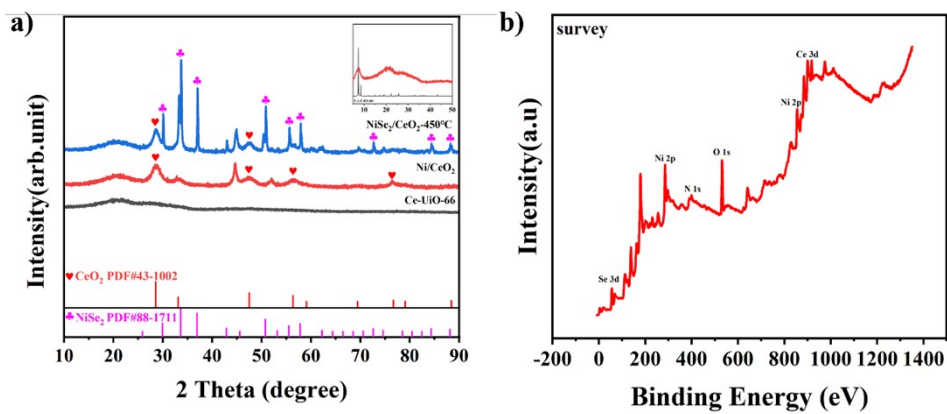

Fig S2. (a) XRD patterns of NiSe<sub>2</sub>/CeO<sub>2</sub>-450 °C, Ni/CeO<sub>2</sub> and Ce-UiO-66 (the inset shows the XRD patterns of Ce-UiO-66); (b) XPS spectrum tests of Survey.

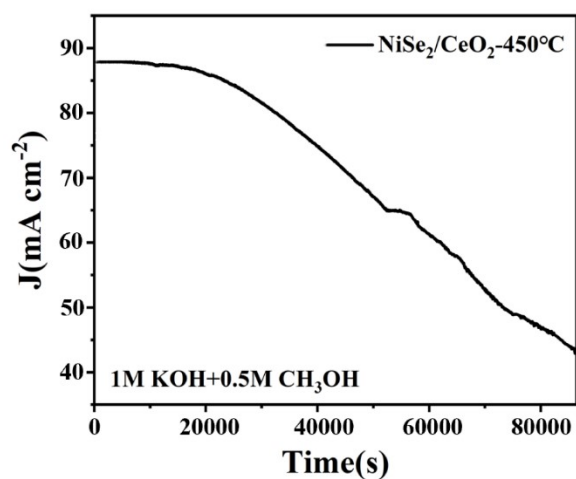

Fig S3. Chrono-current profile of NiSe<sub>2</sub>/CeO<sub>2</sub>-450 °C sample in 0.5 M methanol at 1.5 V

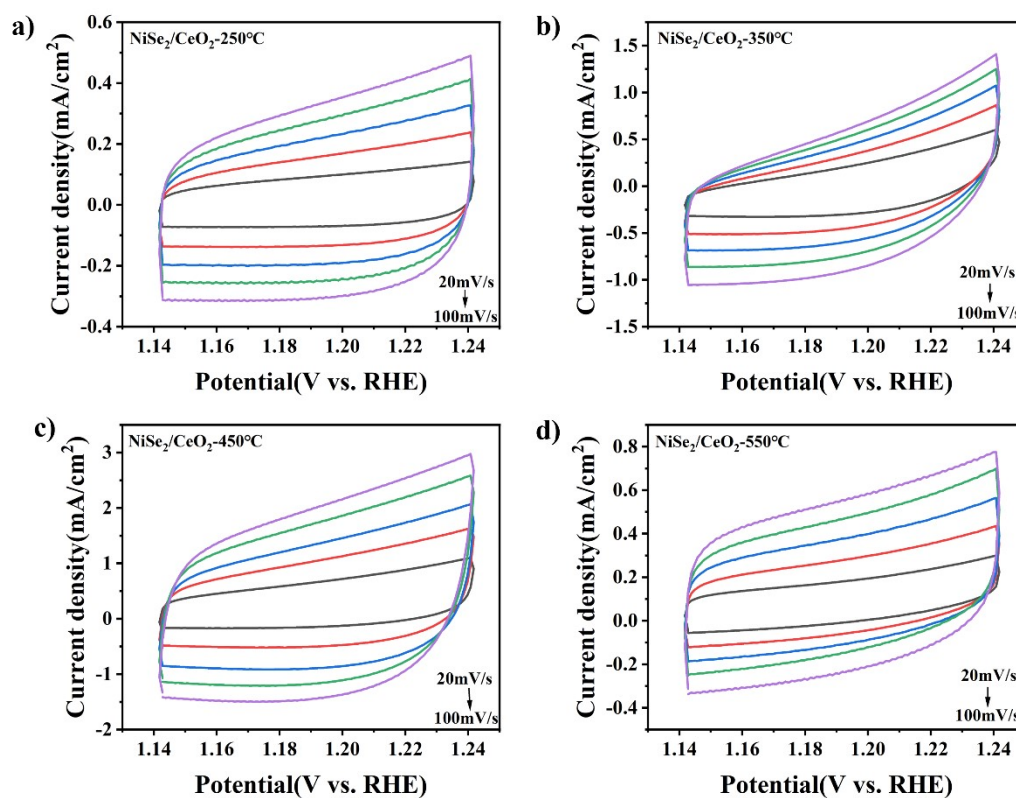

Fig S4. (a-d) NiSe<sub>2</sub>/CeO<sub>2</sub>-250 °C, NiSe<sub>2</sub>/CeO<sub>2</sub>-350 °C, NiSe<sub>2</sub>/CeO<sub>2</sub>-450 °C, and NiSe<sub>2</sub>/CeO<sub>2</sub>-550 °C at scan rate of 20, 40, 60, 80 and 100 mV s<sup>-1</sup> in 1 M KOH solution.

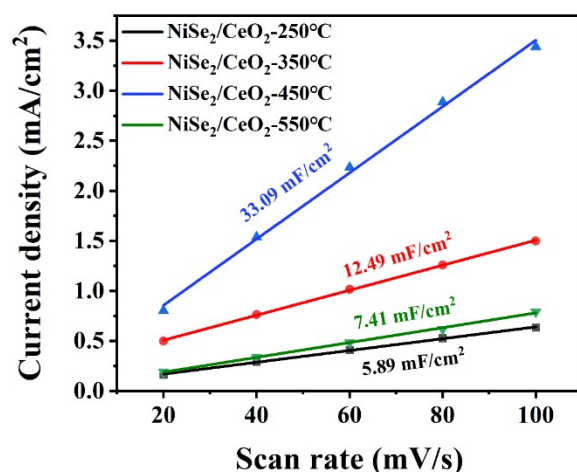

**Fig S5.** The  $C_{dl}$  of nickel based catalysts with  $NiSe_2/CeO_2$ -250°C,  $NiSe_2/CeO_2$ -350°C,  $NiSe_2/CeO_2$ -450°C, and  $NiSe_2/CeO_2$ -550°C.

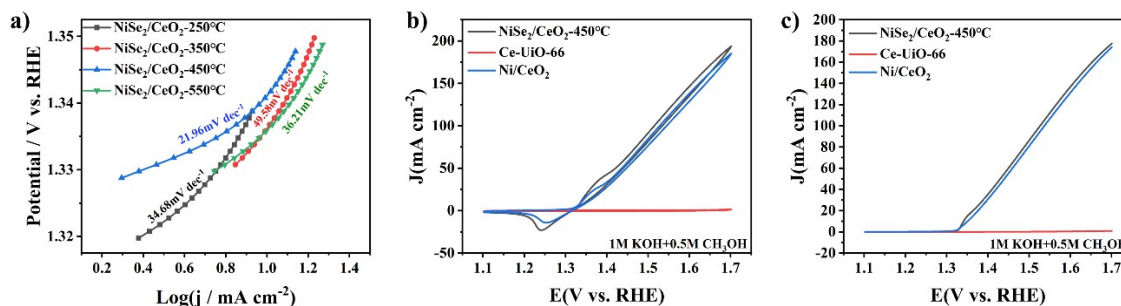

**Fig S6.** (a) The Tafel plots of different samples in methanol; (b) CVs of  $NiSe_2/CeO_2$ -450°C, Ce-UiO-66 and Ni/CeO<sub>2</sub> in 1 M KOH containing 0.5 M MeOH. (c) LSV of  $NiSe_2/CeO_2$ -450°C, Ce-UiO-66 and Ni/CeO<sub>2</sub> in 1M KOH containing 0.5 M MeOH (sweep speed: 50 mV s<sup>-1</sup>).

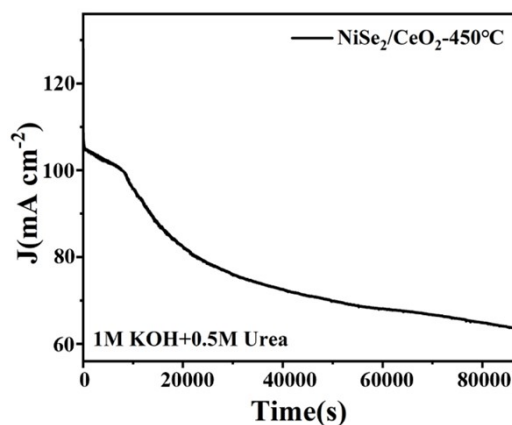

**Fig S7.** Chrono-current profile of  $NiSe_2/CeO_2$ -450 °C sample in 0.5 M Urea at 1.5 V

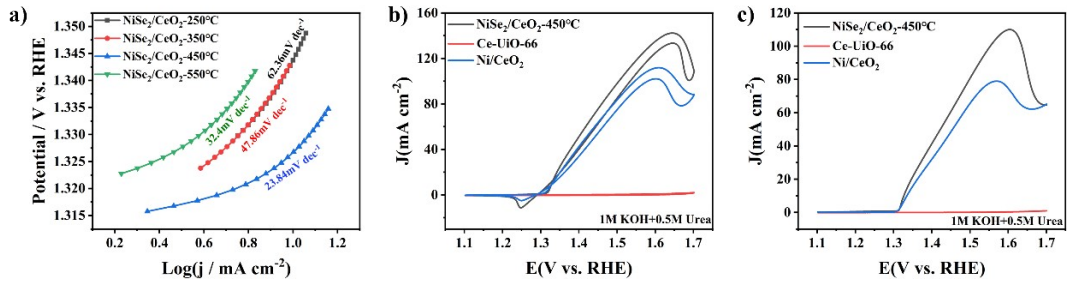

**Fig S8.** (a) The Tafel plots of different samples in urea oxidation; (b) CVs of NiSe<sub>2</sub>/CeO<sub>2</sub>-450°C, Ce-UiO-66 and Ni/CeO<sub>2</sub> in 1 M KOH containing 0.5 M urea. (c) LSV of NiSe<sub>2</sub>/CeO<sub>2</sub>-450°C, Ce-UiO-66 and Ni/CeO<sub>2</sub> in 1M KOH containing 0.5 M urea (sweep speed: 50 mV s<sup>-1</sup>).

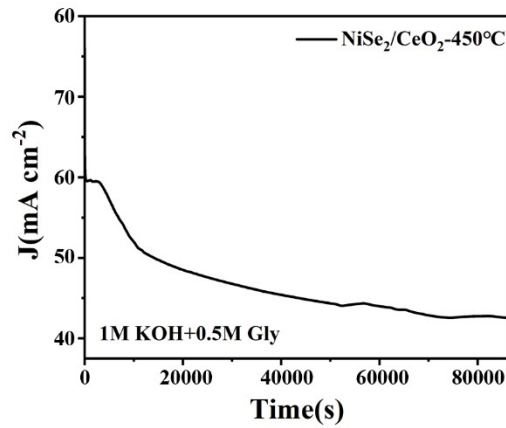

**Fig S9.** Chrono-current profile of NiSe<sub>2</sub>/CeO<sub>2</sub>-450 °C sample in 0.5 M Glycerol at 1.5 V

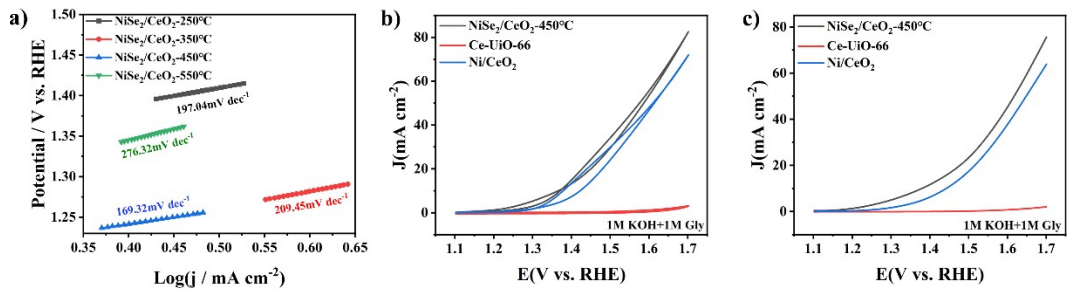

**Fig S10.** (a) The Tafel plots of different samples in glycerol oxidation; (b) CVs of NiSe<sub>2</sub>/CeO<sub>2</sub>-450°C, Ce-UiO-66 and Ni/CeO<sub>2</sub> in 1 M KOH containing 1 M glycerol. (c) LSV of NiSe<sub>2</sub>/CeO<sub>2</sub>-450°C, Ce-UiO-66 and Ni/CeO<sub>2</sub> in 1M KOH containing 1 M glycerol (sweep speed: 50 mV s<sup>-1</sup>).
